# Supplementary material for: An Interaction between RRP6 and SU(VAR)3-9 Targets RRP6 to Heterochromatin and Contributes to Heterochromatin Maintenance in Drosophila melanogaster
Source: PubMed Central journal article supplement (PMC4577213; doi:10.1371/journal.pgen.1005523), 2015-09-21
Supplement: pgen.1005523.s001.pdf [file pgen.1005523.s001.pdf]

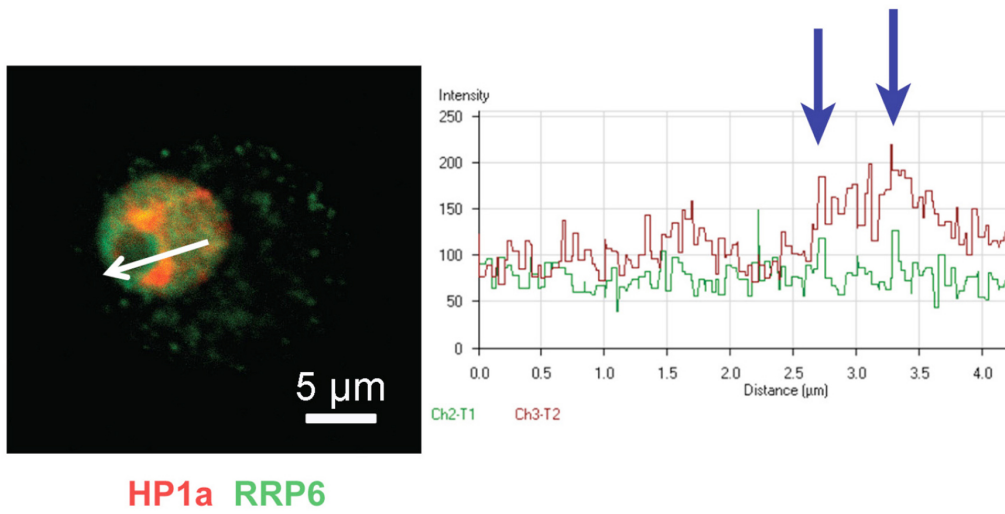

Figure S1
