# Supplementary material for: An Interaction between RRP6 and SU(VAR)3-9 Targets RRP6 to Heterochromatin and Contributes to Heterochromatin Maintenance in Drosophila melanogaster
Source: PubMed Central journal article supplement (PMC4577213; doi:10.1371/journal.pgen.1005523), 2015-09-21
Supplement: pgen.1005523.s005.pdf [file pgen.1005523.s005.pdf]

A

% DNA contamination  
(measured for Actin)

|                                 | EXP I  | EXP II | EXP III |
|---------------------------------|--------|--------|---------|
| <b>total RNA</b>                | 0.0026 | 0.0064 | 0.00279 |
| <b>chromatin associated RNA</b> | 0.0043 | 0.0076 | 0.00093 |

B

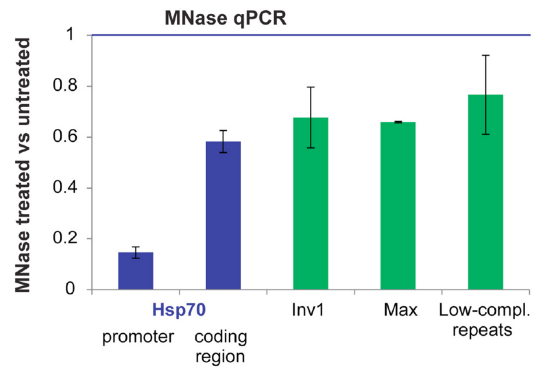

Figure S5
