# Supplementary material for: An Interaction between RRP6 and SU(VAR)3-9 Targets RRP6 to Heterochromatin and Contributes to Heterochromatin Maintenance in Drosophila melanogaster
Source: PubMed Central journal article supplement (PMC4577213; doi:10.1371/journal.pgen.1005523), 2015-09-21
Supplement: pgen.1005523.s012.pdf [file pgen.1005523.s012.pdf]

A

| Treatment     | Sample    | Nr. mapped reads | Nr. RRP6-rich regions | q-value cutoff | Average length (bp) | Average fold enrichment |
|---------------|-----------|------------------|-----------------------|----------------|---------------------|-------------------------|
| GFP control   | Input DNA | 10,525,698       |                       |                |                     |                         |
| Su(Var)3-9-KD | Input DNA | 9,962,593        |                       |                |                     |                         |
| GFP control   | ChIP DNA  | 12,190,050       | 5447                  | 5.00e-02       | 134,9               | 4,7                     |
| Su(Var)3-9-KD | ChIP DNA  | 8,191,052        | 4733                  | 5.00e-02       | 120,5               | 5,5                     |

B

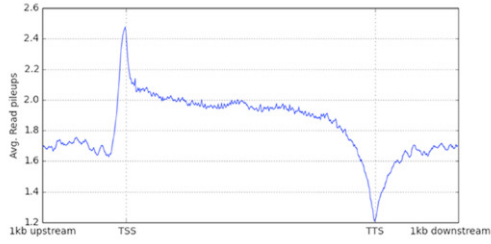

C

| Chromosome | Nr. RRP6-rich regions in GFP control | Nr. regions downregulated in Su(Var)3-9 KD | Nr. regions upregulated in Su(Var)3-9 KD |
|------------|--------------------------------------|--------------------------------------------|------------------------------------------|
| X          | 928                                  | 146                                        | 151                                      |
| 2L         | 399                                  | 138                                        | 103                                      |
| 2R         | 424                                  | 137                                        | 74                                       |
| 3L         | 390                                  | 145                                        | 105                                      |
| 3R         | 582                                  | 166                                        | 134                                      |
| 4          | 5                                    | 5                                          | 6                                        |
| U          | 132                                  | 77                                         | 20                                       |
| Uextra     | 2505                                 | 683                                        | 220                                      |
| XHet       | 4                                    | 0                                          | 1                                        |
| YHet       | 4                                    | 3                                          | 1                                        |
| 3RHet      | 32                                   | 22                                         | 1                                        |
| 3LHet      | 16                                   | 12                                         | 1                                        |
| 2RHet      | 23                                   | 17                                         | 6                                        |
| 2LHet      | 3                                    | 2                                          | 0                                        |

D

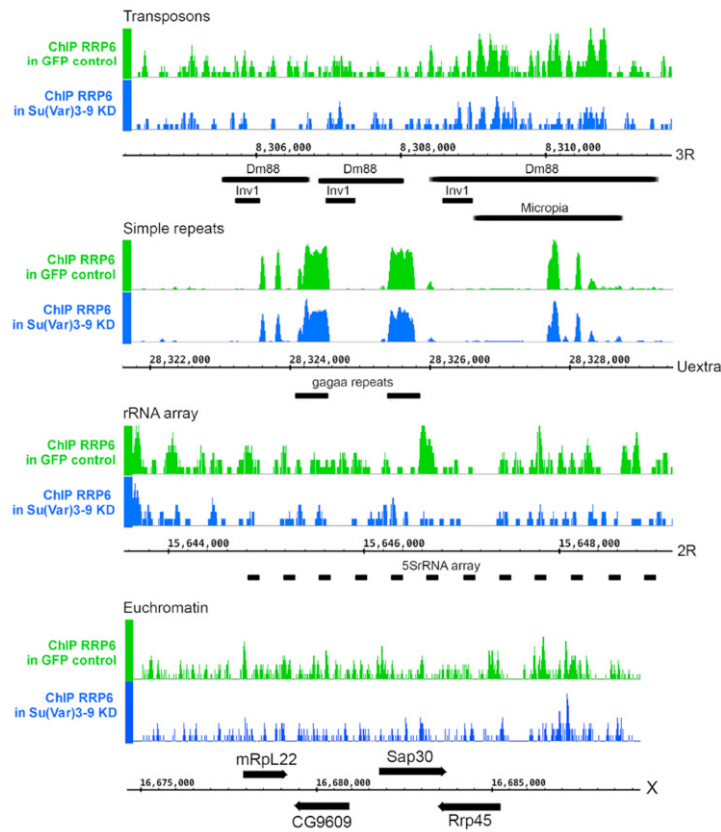

Figure S12
