# Supplementary material for: An Interaction between RRP6 and SU(VAR)3-9 Targets RRP6 to Heterochromatin and Contributes to Heterochromatin Maintenance in Drosophila melanogaster
Source: PubMed Central journal article supplement (PMC4577213; doi:10.1371/journal.pgen.1005523), 2015-09-21
Supplement: pgen.1005523.s016.pdf [file pgen.1005523.s016.pdf]

**Table S1. List of Rrp6 interactors (FDR < 0.01)**

| GI       | Gene_Name*                                          | P-value | Q-value  | Log-fold-enrichment |
|----------|-----------------------------------------------------|---------|----------|---------------------|
| 45549251 | misshapen CG16973-PA, isoform A                     | 1E-15   | 8,71E-17 | 7,81                |
| 13560842 | heat shock protein Hsp70Ba                          | 1E-15   | 8,71E-17 | 7,79                |
| 24653408 | Myb-interacting protein 120 CG6061-PA               | 1E-15   | 8,71E-17 | 7,03                |
| 17933682 | small bristles CG1664-PA                            | 1E-15   | 8,71E-17 | 6,90                |
| 71490    | heat shock protein 26 - fruit fly                   | 1E-15   | 8,71E-17 | 6,45                |
| 16265798 | nucleosome remodeling factor large subunit NURF301  | 1E-15   | 8,71E-17 | 6,34                |
| 24647320 | serpent CG3992-PB, isoform B                        | 1E-15   | 8,71E-17 | 5,94                |
| 6434958  | 26S proteasome regulatory complex subunit p42D      | 1E-15   | 8,71E-17 | 5,88                |
| 28574115 | CG4747-PA                                           | 1E-15   | 8,71E-17 | 5,81                |
| 24646242 | MBD-R2 CG10042-PA, isoform A                        | 1E-15   | 8,71E-17 | 5,75                |
| 17137252 | viking CG16858-PA                                   | 1E-15   | 8,71E-17 | 5,70                |
| 24647046 | Suppressor of variegation 3-9 CG6476-PB, isoform B  | 1E-15   | 8,71E-17 | 5,69                |
| 24658883 | CG3800-PA                                           | 1E-15   | 8,71E-17 | 5,66                |
| 24645257 | CG11033-PA                                          | 1E-15   | 8,71E-17 | 5,51                |
| 600424   | FKBP39                                              | 1E-15   | 8,71E-17 | 5,46                |
| 17737397 | Kruppel homolog 2 CG9159-PA                         | 1E-15   | 8,71E-17 | 5,35                |
| 24652438 | midlife-crisis CG11763-PA, isoform A                | 1E-15   | 8,71E-17 | 5,29                |
| 45550973 | Phosphoethanolamine cytidyltransferase CG5547-PB    | 1E-15   | 8,71E-17 | 5,09                |
| 157906   | maleless protein                                    | 1E-15   | 8,71E-17 | 5,04                |
| 7833     | dynammin                                            | 1E-15   | 8,71E-17 | 5,01                |
| 24665814 | CG6512-PB, isoform B                                | 1E-15   | 8,71E-17 | 4,99                |
| 24640727 | Bx42 CG8264-PA                                      | 1E-15   | 8,71E-17 | 4,94                |
| 24640482 | female sterile (1) homoeotic CG2252-PB, isoform B   | 1E-15   | 8,71E-17 | 4,91                |
| 1170808  | Longitudinals lacking protein, isoform G            | 1E-15   | 8,71E-17 | 4,88                |
| 24639372 | CG8636-PA                                           | 1E-15   | 8,71E-17 | 4,86                |
| 18921137 | Ribosomal protein L17 CG3203-PD, isoform D          | 1E-15   | 8,71E-17 | 4,83                |
| 24583463 | Fatty acid (long chain) transport protein CG7400-PA | 1E-15   | 8,71E-17 | 4,81                |
| 21392078 | RE09547p                                            | 1E-15   | 8,71E-17 | 4,80                |
| 3676167  | coatomer alpha subunit                              | 1E-15   | 8,71E-17 | 4,79                |
| 18860081 | Yippee CG1989-PA, isoform A                         | 1E-15   | 8,71E-17 | 4,77                |
| 19921856 | CG8230-PA                                           | 1E-15   | 8,71E-17 | 4,77                |
| 18859989 | CG9281-PB, isoform B                                | 1E-15   | 8,71E-17 | 4,74                |
| 24583731 | crooked legs CG14938-PD, isoform D                  | 1E-15   | 8,71E-17 | 4,70                |
| 78706838 | Muscle-specific protein 300 CG33715-PD, isoform D   | 1E-15   | 8,71E-17 | 4,68                |
| 606751   | RNA binding protein                                 | 1E-15   | 8,71E-17 | 4,65                |
| 17136888 | RNA polymerase II elongation factor CG3710-PA       | 1E-15   | 8,71E-17 | 4,65                |
| 24660036 | sec63 CG8583-PA                                     | 1E-15   | 8,71E-17 | 4,60                |

|          |                                                         |       |          |      |
|----------|---------------------------------------------------------|-------|----------|------|
| 21356859 | Rpn1 CG7762-PA                                          | 1E-15 | 8,71E-17 | 4,56 |
| 28573444 | Rrp42 CG8395-PA                                         | 1E-15 | 8,71E-17 | 4,52 |
| 17862648 | LD43057p                                                | 1E-15 | 8,71E-17 | 4,50 |
| 1401254  | nucleoplasmin-like protein-short                        | 1E-15 | 8,71E-17 | 4,45 |
| 24639109 | CG14782-PA                                              | 1E-15 | 8,71E-17 | 4,44 |
| 19922030 | Translocon-associated protein delta<br>CG9035-PA        | 1E-15 | 8,71E-17 | 4,44 |
| 18860035 | Dlic2 CG1938-PA, isoform A                              | 1E-15 | 8,71E-17 | 4,43 |
| 21355403 | CG4452-PA, isoform A                                    | 1E-15 | 8,71E-17 | 4,43 |
| 20130427 | CG2199-PA, isoform A                                    | 1E-15 | 8,71E-17 | 4,43 |
| 21356927 | Ribosomal protein L35A CG2099-PA                        | 1E-15 | 8,71E-17 | 4,39 |
| 28573655 | pita CG3941-PA, isoform A                               | 1E-15 | 8,71E-17 | 4,38 |
| 17864298 | hoi-polloi CG3949-PA                                    | 1E-15 | 8,71E-17 | 4,36 |
| 16648488 | SD05406p                                                | 1E-15 | 8,71E-17 | 4,35 |
| 17647893 | Ribosomal protein S26 CG10305-PB,<br>isoform B          | 1E-15 | 8,71E-17 | 4,34 |
| 85816181 | hangover CG32575-PB, isoform B                          | 1E-15 | 8,71E-17 | 4,33 |
| 24646936 | Rrp6 CG7292-PA                                          | 1E-15 | 8,71E-17 | 4,33 |
| 17137634 | smt3 CG4494-PA                                          | 1E-15 | 8,71E-17 | 4,32 |
| 21430048 | GM13065p                                                | 1E-15 | 8,71E-17 | 4,32 |
| 20129993 | CG10131-PA                                              | 1E-15 | 8,71E-17 | 4,32 |
| 126746   | 205 kDa microtubule-associated protein                  | 1E-15 | 8,71E-17 | 4,31 |
| 21357009 | Ribosomal protein L18 CG8615-PA                         | 1E-15 | 8,71E-17 | 4,24 |
| 45549187 | Nucleosome remodeling factor - 38kD<br>CG4634-PA        | 1E-15 | 8,71E-17 | 4,22 |
| 17647879 | Ribosomal protein L13 CG4651-PA, isoform<br>A           | 1E-15 | 8,71E-17 | 4,21 |
| 17933574 | cut up CG6998-PA, isoform A                             | 1E-15 | 8,71E-17 | 4,20 |
| 24642563 | Nup153 CG4453-PA                                        | 1E-15 | 8,71E-17 | 4,19 |
| 158749   | tubulin-beta-3                                          | 1E-15 | 8,71E-17 | 4,19 |
| 21357575 | CTP phosphocholine cytidyltransferase 1<br>CG1049-PA    | 1E-15 | 8,71E-17 | 4,17 |
| 33589646 | AT24152p                                                | 1E-15 | 8,71E-17 | 4,17 |
| 7919     | unnamed protein product                                 | 1E-15 | 8,71E-17 | 4,17 |
| 2706522  | ubiquitin activating enzyme                             | 1E-15 | 8,71E-17 | 4,16 |
| 6491997  | SPT6 protein                                            | 1E-15 | 8,71E-17 | 4,14 |
| 8444     | unnamed protein product                                 | 1E-15 | 8,71E-17 | 4,11 |
| 4378008  | ribosomal protein L22                                   | 1E-15 | 8,71E-17 | 4,09 |
| 21355245 | CG6322-PA                                               | 1E-15 | 8,71E-17 | 4,09 |
| 17975579 | Ribosomal protein S14a CG1524-PB,<br>isoform B          | 1E-15 | 8,71E-17 | 4,06 |
| 24641266 | CG1737-PA                                               | 1E-15 | 8,71E-17 | 4,06 |
| 10334685 | phosphoglycerate mutase                                 | 1E-15 | 8,71E-17 | 4,05 |
| 6093992  | 60S ribosomal protein L10 (QM protein<br>homolog) (dQM) | 1E-15 | 8,71E-17 | 4,02 |
| 17647889 | Ribosomal protein S17 CG3922-PB                         | 1E-15 | 8,71E-17 | 4,01 |
| 19922464 | eIF3-S8 CG4954-PA                                       | 1E-15 | 8,71E-17 | 3,99 |
| 17137198 | Ribosomal protein L9 CG6141-PA, isoform<br>A            | 1E-15 | 8,71E-17 | 3,97 |
| 3953611  | MCM7                                                    | 1E-15 | 8,71E-17 | 3,97 |
| 17864162 | Ribosomal protein S3A CG2168-PA, isoform<br>A           | 1E-15 | 8,71E-17 | 3,96 |
| 18859933 | lethal (1) G0022 CG8231-PA                              | 1E-15 | 8,71E-17 | 3,94 |
| 19922746 | Ribosomal protein S16 CG4046-PA                         | 1E-15 | 8,71E-17 | 3,93 |

|          |                                                                              |       |          |      |
|----------|------------------------------------------------------------------------------|-------|----------|------|
| 17648041 | Trip1 CG8882-PA                                                              | 1E-15 | 8,71E-17 | 3,93 |
| 24583646 | CG4738-PA                                                                    | 1E-15 | 8,71E-17 | 3,92 |
| 24657454 | CG1316-PA                                                                    | 1E-15 | 8,71E-17 | 3,90 |
| 24664062 | CG32138-PA, isoform A                                                        | 1E-15 | 8,71E-17 | 3,88 |
| 16185578 | LD42783p                                                                     | 1E-15 | 8,71E-17 | 3,87 |
| 24762707 | CG4806-PA                                                                    | 1E-15 | 8,71E-17 | 3,85 |
| 103304   | phosphoprotein phosphatase (EC 3.1.3.16)<br>65K regulatory chain - fruit fly | 1E-15 | 8,71E-17 | 3,84 |
| 17157991 | thioredoxin peroxidase 1 CG1633-PA,<br>isoform A                             | 1E-15 | 8,71E-17 | 3,83 |
| 24655737 | beta-Tubulin at 56D CG9277-PB, isoform B                                     | 1E-15 | 8,71E-17 | 3,81 |
| 19921802 | CG2158-PA                                                                    | 1E-15 | 8,71E-17 | 3,81 |
| 17136574 | Ribosomal protein S27A CG5271-PA                                             | 1E-15 | 8,71E-17 | 3,80 |
| 17137572 | Elongation factor 1alpha48D CG8280-PA,<br>isoform A                          | 1E-15 | 8,71E-17 | 3,79 |
| 28571526 | CG31549-PA                                                                   | 1E-15 | 8,71E-17 | 3,79 |
| 24645909 | CG5214-PA                                                                    | 1E-15 | 8,71E-17 | 3,77 |
| 17738165 | Heat shock protein 68 CG5436-PA                                              | 1E-15 | 8,71E-17 | 3,75 |
| 17737967 | Heat shock protein cognate 4 CG4264-PA,<br>isoform A                         | 1E-15 | 8,71E-17 | 3,75 |
| 19921654 | CG10417-PA, isoform A                                                        | 1E-15 | 8,71E-17 | 3,74 |
| 19921922 | Ribosomal protein L31 CG1821-PB, isoform<br>B                                | 1E-15 | 8,71E-17 | 3,74 |
| 24585720 | CG1416-PA, isoform A                                                         | 1E-15 | 8,71E-17 | 3,73 |
| 24665395 | CG4169-PA                                                                    | 1E-15 | 8,71E-17 | 3,70 |
| 17647521 | Heat shock protein 27 CG4466-PA                                              | 1E-15 | 8,71E-17 | 3,70 |
| 19528335 | LD21358p                                                                     | 1E-15 | 8,71E-17 | 3,66 |
| 24656161 | CG1244-PA, isoform A                                                         | 1E-15 | 8,71E-17 | 3,64 |
| 19922004 | Rpb5 CG11979-PA                                                              | 1E-15 | 8,71E-17 | 3,64 |
| 17738077 | Ribosomal protein S20 CG15693-PA                                             | 1E-15 | 8,71E-17 | 3,63 |
| 1666637  | histone deacetylase                                                          | 1E-15 | 8,71E-17 | 3,62 |
| 1168016  | 26S protease regulatory complex non-<br>ATPase subunit                       | 1E-15 | 8,71E-17 | 3,58 |
| 19921810 | CG8707-PA                                                                    | 1E-15 | 8,71E-17 | 3,57 |
| 6433838  | DNop5 protein                                                                | 1E-15 | 8,71E-17 | 3,57 |
| 17864148 | gamma-coatomer protein CG1528-PA,<br>isoform A                               | 1E-15 | 8,71E-17 | 3,57 |
| 6942155  | putative cytoplasmic aminopeptidase                                          | 1E-15 | 8,71E-17 | 3,57 |
| 17945866 | RE39378p                                                                     | 1E-15 | 8,71E-17 | 3,56 |
| 17647553 | ken and barbie CG5575-PA                                                     | 1E-15 | 8,71E-17 | 3,55 |
| 21356869 | Su(z)12 CG8013-PA, isoform A                                                 | 1E-15 | 8,71E-17 | 3,54 |
| 16197833 | GH10480p                                                                     | 1E-15 | 8,71E-17 | 3,54 |
| 21428348 | GM02257p                                                                     | 1E-15 | 8,71E-17 | 3,51 |
| 17647885 | Ribosomal protein L18A CG6510-PA                                             | 1E-15 | 8,71E-17 | 3,51 |
| 1072120  | nucleosome assembly protein NAP-1                                            | 1E-15 | 8,71E-17 | 3,50 |
| 21355533 | CG8108-PB, isoform B                                                         | 1E-15 | 8,71E-17 | 3,49 |
| 78707302 | kayak CG33956-PD, isoform D                                                  | 1E-15 | 8,71E-17 | 3,49 |
| 45549221 | Suppressor of variegation 3-7 CG8599-PA                                      | 1E-15 | 8,71E-17 | 3,49 |
| 24649976 | Ribosomal protein S27 CG10423-PA                                             | 1E-15 | 8,71E-17 | 3,47 |
| 6631000  | bonus                                                                        | 1E-15 | 8,71E-17 | 3,46 |
| 18860045 | Klp10A CG1453-PA, isoform A                                                  | 1E-15 | 8,71E-17 | 3,46 |
| 54650868 | GM06787p                                                                     | 1E-15 | 8,71E-17 | 3,45 |
| 4325130  | dMi-2 protein                                                                | 1E-15 | 8,71E-17 | 3,45 |
| 16768870 | LD09503p                                                                     | 1E-15 | 8,71E-17 | 3,39 |

|          |                                                       |       |          |      |
|----------|-------------------------------------------------------|-------|----------|------|
| 157810   | laminin receptor                                      | 1E-15 | 8,71E-17 | 3,38 |
| 1305408  | D-stat protein short form                             | 1E-15 | 8,71E-17 | 3,38 |
| 24584738 | CG31739-PA                                            | 1E-15 | 8,71E-17 | 3,38 |
| 24658349 | CG10630-PA                                            | 1E-15 | 8,71E-17 | 3,37 |
| 17136324 | Ribosomal protein S3 CG6779-PA                        | 1E-15 | 8,71E-17 | 3,37 |
| 17136986 | twinstar CG4254-PA                                    | 1E-15 | 8,71E-17 | 3,37 |
| 21358013 | CG1957-PA, isoform A                                  | 1E-15 | 8,71E-17 | 3,36 |
| 17137796 | G protein salpha 60A CG2835-PB, isoform B             | 1E-15 | 8,71E-17 | 3,35 |
| 24653714 | Boundary element-associated factor of 32kD CG10159-PB | 1E-15 | 8,71E-17 | 3,35 |
| 62471723 | CG33505-PA                                            | 1E-15 | 8,71E-17 | 3,35 |
| 8356     | protein kinase                                        | 1E-15 | 8,71E-17 | 3,34 |
| 17737290 | Ribosomal protein S6 CG10944-PB, isoform B            | 1E-15 | 8,71E-17 | 3,34 |
| 17975567 | Ribosomal protein S15Aa CG2033-PD, isoform D          | 1E-15 | 8,71E-17 | 3,33 |
| 16768790 | LD03515p                                              | 1E-15 | 8,71E-17 | 3,33 |
| 19922556 | CG5482-PA                                             | 1E-15 | 8,71E-17 | 3,33 |
| 2950374  | C-terminal binding protein                            | 1E-15 | 8,71E-17 | 3,30 |
| 17737463 | Imitation SWI CG8625-PA, isoform A                    | 1E-15 | 8,71E-17 | 3,30 |
| 17647581 | lark CG8597-PA, isoform A                             | 1E-15 | 8,71E-17 | 3,30 |
| 2947310  | nucleoporin                                           | 1E-15 | 8,71E-17 | 3,29 |
| 158200   | Dras1 protein                                         | 1E-15 | 8,71E-17 | 3,29 |
| 13446610 | putative exoribonuclease DIS3                         | 1E-15 | 8,71E-17 | 3,29 |
| 20129705 | Ribosomal protein L21 CG12775-PA                      | 1E-15 | 8,71E-17 | 3,29 |
| 17137740 | Proteasome p44.5 subunit CG10149-PB, isoform B        | 1E-15 | 8,71E-17 | 3,28 |
| 18860087 | eIF-2alpha CG9946-PA                                  | 1E-15 | 8,71E-17 | 3,28 |
| 19923002 | CG12030-PA                                            | 1E-15 | 8,71E-17 | 3,28 |
| 17737731 | Ribosomal protein LP0 CG7490-PA                       | 1E-15 | 8,71E-17 | 3,27 |
| 19921464 | CG6453-PA                                             | 1E-15 | 8,71E-17 | 3,24 |
| 24647704 | Splicing factor 1 CG5836-PA                           | 1E-15 | 8,71E-17 | 3,23 |
| 17946442 | RE67757p                                              | 1E-15 | 8,71E-17 | 3,23 |
| 158821   | zinc-finger homeodomain protein 1                     | 1E-15 | 8,71E-17 | 3,22 |
| 11024346 | heat shock protein Hsp70Aa                            | 1E-15 | 8,71E-17 | 3,22 |
| 21355591 | Srp68 CG5064-PA                                       | 1E-15 | 8,71E-17 | 3,22 |
| 22024141 | Ribosomal protein S23 CG8415-PA                       | 1E-15 | 8,71E-17 | 3,20 |
| 2290597  | RACK1                                                 | 1E-15 | 8,71E-17 | 3,19 |
| 158769   | ubiquitin                                             | 1E-15 | 8,71E-17 | 3,18 |
| 24643970 | CG14648-PB, isoform B                                 | 1E-15 | 8,71E-17 | 3,17 |
| 24584645 | CG31738-PB, isoform B                                 | 1E-15 | 8,71E-17 | 3,15 |
| 24586291 | Cyt-b5 CG2140-PB, isoform B                           | 1E-15 | 8,71E-17 | 3,14 |
| 17136564 | alpha-Tubulin at 84B CG1913-PA                        | 1E-15 | 8,71E-17 | 3,11 |
| 24643266 | CG14200-PA                                            | 1E-15 | 8,71E-17 | 3,11 |
| 8488     | unnamed protein product                               | 1E-15 | 8,71E-17 | 3,10 |
| 28571872 | baiser CG11785-PA                                     | 1E-15 | 8,71E-17 | 3,09 |
| 24586038 | CG17266-PA                                            | 1E-15 | 8,71E-17 | 3,09 |
| 17865835 | Rab-protein 7 CG5915-PA                               | 1E-15 | 8,71E-17 | 3,08 |
| 17736973 | Rab-protein 5 CG3664-PE, isoform E                    | 1E-15 | 8,71E-17 | 3,06 |
| 21358459 | Ribosomal protein S7 CG1883-PA, isoform A             | 1E-15 | 8,71E-17 | 3,05 |
| 45550830 | Nup358 CG11856-PA                                     | 1E-15 | 8,71E-17 | 3,05 |
| 3309275  | karyopherin alpha 3                                   | 1E-15 | 8,71E-17 | 3,04 |
| 24649978 | CG11875-PA                                            | 1E-15 | 8,71E-17 | 3,03 |

|          |                                                      |          |          |      |
|----------|------------------------------------------------------|----------|----------|------|
| 21357547 | CG8863-PA, isoform A                                 | 1E-15    | 8,71E-17 | 3,01 |
| 24668543 | Isoleucyl-tRNA synthetase CG11471-PA, isoform A      | 1E-15    | 8,71E-17 | 3,01 |
| 156750   | actin                                                | 1E-15    | 8,71E-17 | 3,01 |
| 24651986 | Suppressor of variegation 2-10 CG8068-PI, isoform I  | 1E-15    | 8,71E-17 | 2,99 |
| 19921728 | CG11107-PA                                           | 1E-15    | 8,71E-17 | 2,98 |
| 25012530 | RE33426p                                             | 1E-15    | 8,71E-17 | 2,97 |
| 558485   | ribosomal protein DL11                               | 1E-15    | 8,71E-17 | 2,97 |
| 19921434 | CaBP1 CG5809-PA                                      | 1E-15    | 8,71E-17 | 2,92 |
| 17647529 | Heat shock protein 83 CG1242-PA                      | 1E-15    | 8,71E-17 | 2,91 |
| 24639740 | lethal (1) G0334 CG7010-PC, isoform C                | 1E-15    | 8,71E-17 | 2,90 |
| 440853   | ribosomal protein S4                                 | 1E-15    | 8,71E-17 | 2,89 |
| 21355785 | CG8436-PA                                            | 1E-15    | 8,71E-17 | 2,88 |
| 2209280  | SLY1 homologous                                      | 1E-15    | 8,71E-17 | 2,87 |
| 25012218 | LD02622p                                             | 1E-15    | 8,71E-17 | 2,87 |
| 20128923 | CG2918-PA                                            | 1E-15    | 8,71E-17 | 2,86 |
| 6517192  | Drab2                                                | 1E-15    | 8,71E-17 | 2,85 |
| 17737907 | Ribosomal protein L3 CG4863-PA, isoform A            | 1E-15    | 8,71E-17 | 2,84 |
| 24583962 | CG5787-PA                                            | 1E-15    | 8,71E-17 | 2,82 |
| 2245467  | DUG                                                  | 1E-15    | 8,71E-17 | 2,80 |
| 311343   | GTP-binding protein                                  | 1E-15    | 8,71E-17 | 2,80 |
| 1621615  | U2 snRNP auxiliary factor                            | 1E-15    | 8,71E-17 | 2,76 |
| 19920866 | CG11266-PB, isoform B                                | 1E-15    | 8,71E-17 | 2,76 |
| 17975542 | Histone H4 replacement CG3379-PC, isoform C          | 1E-15    | 9,57E-17 | 2,74 |
| 51091987 | SD11791p                                             | 1E-15    | 9,57E-17 | 2,74 |
| 21358145 | CG11876-PD, isoform D                                | 1E-15    | 1,05E-16 | 2,74 |
| 21358615 | CG7920-PA, isoform A                                 | 1E-15    | 1,23E-16 | 2,73 |
| 17737957 | suppressor of Hairy wing CG8573-PA, isoform A        | 1E-15    | 1,51E-16 | 2,72 |
| 1373433  | vacuolar ATPase subunit A                            | 1E-15    | 1,69E-16 | 2,72 |
| 17136268 | cropped CG7664-PA                                    | 1E-15    | 1,78E-16 | 2,72 |
| 24649446 | Proteasome 26S subunit subunit 4 ATPase CG5289-PA    | 1E-15    | 2,14E-16 | 2,71 |
| 20129315 | CG5261-PB, isoform B                                 | 1E-15    | 2,41E-16 | 2,70 |
| 7662     | Bj6 protein                                          | 5,00E-15 | 4,15E-16 | 2,68 |
| 33088246 | adherin Nipped-B                                     | 5,55E-15 | 4,58E-16 | 2,67 |
| 17137592 | Int6 homologue CG9677-PA                             | 6,00E-15 | 4,93E-16 | 2,67 |
| 8484     | ribosomal protein                                    | 6,11E-15 | 5,00E-16 | 2,67 |
| 17737553 | Heat shock protein 23 CG4463-PA                      | 6,77E-15 | 5,52E-16 | 2,67 |
| 17647555 | Kinesin light chain CG5433-PA                        | 7,99E-15 | 6,48E-16 | 2,66 |
| 2653645  | zinc finger 30C                                      | 1,08E-14 | 8,65E-16 | 2,65 |
| 495594   | poly(A)-binding protein                              | 1,24E-14 | 9,94E-16 | 2,64 |
| 21357495 | CG10103-PA                                           | 1,51E-14 | 1,20E-15 | 2,63 |
| 24645384 | CG9373-PA                                            | 1,81E-14 | 1,43E-15 | 2,62 |
| 19921458 | CG15141-PA                                           | 1,91E-14 | 1,51E-15 | 2,62 |
| 2944333  | Na <sup>+</sup> /K <sup>+</sup> ATPase alpha subunit | 1,99E-14 | 1,56E-15 | 2,62 |
| 19921636 | cul-2 CG1512-PB, isoform B                           | 2,22E-14 | 1,74E-15 | 2,61 |
| 24644422 | CG10979-PA                                           | 2,46E-14 | 1,92E-15 | 2,61 |
| 4098987  | dMyc1                                                | 2,59E-14 | 2,00E-15 | 2,61 |
| 21355207 | Spase 22/23-subunit CG5677-PA                        | 2,61E-14 | 2,01E-15 | 2,61 |
| 2570794  | transcriptional co-repressor SIN3A                   | 3,56E-14 | 2,74E-15 | 2,59 |

|          |                                                         |          |          |      |
|----------|---------------------------------------------------------|----------|----------|------|
| 19920938 | CG17293-PA                                              | 4,09E-14 | 3,12E-15 | 2,59 |
| 17647245 | T-complex Chaperonin 5 CG8439-PA, isoform A             | 4,21E-14 | 3,20E-15 | 2,59 |
| 3108349  | pyruvate kinase                                         | 4,29E-14 | 3,25E-15 | 2,58 |
| 24644386 | CG2097-PA                                               | 6,08E-14 | 4,59E-15 | 2,57 |
| 24645119 | CG8036-PD, isoform D                                    | 6,36E-14 | 4,78E-15 | 2,57 |
| 20129399 | Aldehyde dehydrogenase CG3752-PA                        | 8,40E-14 | 6,29E-15 | 2,55 |
| 385454   | SqdA                                                    | 1,65E-13 | 1,23E-14 | 2,52 |
| 17864668 | belphegor CG6815-PA                                     | 1,77E-13 | 1,32E-14 | 2,52 |
| 19922796 | lethal (2) k09913 CG3082-PC, isoform C                  | 2,21E-13 | 1,63E-14 | 2,51 |
| 17647425 | Fibrillarin CG9888-PA                                   | 2,23E-13 | 1,64E-14 | 2,51 |
| 17985987 | belle CG9748-PA                                         | 2,67E-13 | 1,96E-14 | 2,50 |
| 21355383 | CG9797-PA                                               | 3,28E-13 | 2,40E-14 | 2,49 |
| 7739698  | Ran binding protein 7                                   | 4,59E-13 | 3,33E-14 | 2,48 |
| 17647193 | beta-coatomer protein CG6223-PA                         | 5,16E-13 | 3,73E-14 | 2,47 |
| 17737841 | Replication Protein A 70 CG9633-PA                      | 6,30E-13 | 4,54E-14 | 2,46 |
| 3256111  | EG 63B12.10                                             | 6,60E-13 | 4,74E-14 | 2,46 |
| 24647885 | 14-3-3epsilon CG31196-PA, isoform A                     | 7,09E-13 | 5,07E-14 | 2,46 |
| 24668824 | Mes2 CG11100-PB, isoform B                              | 9,88E-13 | 7,04E-14 | 2,44 |
| 30059936 | nucleoporin 98-96                                       | 1,23E-12 | 8,72E-14 | 2,43 |
| 21358499 | CG7430-PA                                               | 1,26E-12 | 8,90E-14 | 2,43 |
| 24643409 | CG11943-PB, isoform B                                   | 1,50E-12 | 1,06E-13 | 2,42 |
| 156927   | annexin IX                                              | 1,64E-12 | 1,15E-13 | 2,42 |
| 20130301 | CG17280-PA                                              | 1,70E-12 | 1,19E-13 | 2,42 |
| 40215478 | SD02276p                                                | 1,95E-12 | 1,35E-13 | 2,41 |
| 17738015 | Peroxiredoxin 5037 CG5826-PA                            | 2,16E-12 | 1,50E-13 | 2,40 |
| 16183595 | GM01970p                                                | 2,77E-12 | 1,91E-13 | 2,39 |
| 14161109 | PDGF/VEGF receptor                                      | 3,00E-12 | 2,06E-13 | 2,39 |
| 21357739 | Glycoprotein 93 CG5520-PA                               | 3,27E-12 | 2,24E-13 | 2,38 |
| 40215636 | RE30726p                                                | 3,47E-12 | 2,37E-13 | 2,38 |
| 21357445 | CG12360-PA, isoform A                                   | 3,69E-12 | 2,50E-13 | 2,38 |
| 20129901 | Ribosomal protein S11 CG8857-PA, isoform A              | 4,08E-12 | 2,76E-13 | 2,37 |
| 6694274  | ubiquitin-like protein activating enzyme                | 4,13E-12 | 2,78E-13 | 2,37 |
| 21357741 | CG4951-PA                                               | 4,22E-12 | 2,83E-13 | 2,37 |
| 1770214  | smallminded                                             | 4,44E-12 | 2,97E-13 | 2,37 |
| 15292497 | SD04165p                                                | 4,88E-12 | 3,25E-13 | 2,36 |
| 290260   | phosphoprotein phosphatase 2A 55 kDa regulatory subunit | 5,68E-12 | 3,77E-13 | 2,36 |
| 7109190  | gag protein                                             | 6,83E-12 | 4,52E-13 | 2,35 |
| 908756   | unknown protein                                         | 6,86E-12 | 4,52E-13 | 2,35 |
| 8886088  | eukaryotic initiation factor 5A                         | 7,38E-12 | 4,85E-13 | 2,34 |
| 24656802 | karst CG12008-PA, isoform A                             | 7,93E-12 | 5,19E-13 | 2,34 |
| 158517   | su(s) protein                                           | 8,43E-12 | 5,49E-13 | 2,34 |
| 157365   | enhancer of split protein                               | 8,57E-12 | 5,56E-13 | 2,34 |
| 21356361 | Arginine methyltransferase 1 CG6554-PA                  | 8,64E-12 | 5,59E-13 | 2,34 |
| 24665049 | Signal sequence receptor beta CG5474-PA                 | 1,15E-11 | 7,40E-13 | 2,32 |
| 21357319 | Rpn5 CG1100-PA                                          | 1,24E-11 | 7,93E-13 | 2,32 |
| 17647857 | Replication-factor-C 40kD subunit CG14999-PA            | 1,34E-11 | 8,56E-13 | 2,32 |
| 2597859  | u-shaped                                                | 1,42E-11 | 9,03E-13 | 2,31 |
| 24653791 | CG8092-PA, isoform A                                    | 1,47E-11 | 9,34E-13 | 2,31 |
| 21357041 | CG12171-PA                                              | 1,63E-11 | 1,03E-12 | 2,31 |
| 24645861 | Translationally controlled tumor protein                | 4,00E-11 | 2,52E-12 | 2,26 |

|          |                                                                                 |          |          |      |
|----------|---------------------------------------------------------------------------------|----------|----------|------|
| 24662946 | CG4800-PA<br>Ribosomal protein L10Ab CG7283-PA,<br>isoform A                    | 4,27E-11 | 2,68E-12 | 2,26 |
| 24641198 | GTP-binding protein CG2522-PA                                                   | 5,23E-11 | 3,27E-12 | 2,25 |
| 17737663 | Rab-protein 8 CG8287-PA                                                         | 5,24E-11 | 3,27E-12 | 2,25 |
| 17137738 | Rpt1 CG1341-PA                                                                  | 5,62E-11 | 3,49E-12 | 2,24 |
| 25009816 | AT16867p                                                                        | 5,82E-11 | 3,60E-12 | 2,24 |
| 21357875 | CG3731-PB, isoform B                                                            | 6,70E-11 | 4,14E-12 | 2,23 |
| 18860521 | Ulp1 CG12359-PA                                                                 | 1,05E-10 | 6,43E-12 | 2,21 |
| 21355085 | CG7891-PA                                                                       | 1,21E-10 | 7,43E-12 | 2,20 |
| 19921528 | Asparaginyl-tRNA synthetase CG10687-PA                                          | 1,66E-10 | 1,01E-11 | 2,19 |
| 24581952 | Helicase at 25E CG7269-PA, isoform A                                            | 1,67E-10 | 1,02E-11 | 2,19 |
| 287945   | ATP synthase beta subunit                                                       | 1,87E-10 | 1,13E-11 | 2,18 |
| 19921944 | CG1516-PE, isoform E                                                            | 1,96E-10 | 1,18E-11 | 2,18 |
| 20428641 | 26-29kD-proteinase CG8947-PA                                                    | 2,30E-10 | 1,38E-11 | 2,17 |
| 21357745 | Glutamine fructose-6-phosphate<br>aminotransf 2 CG1345-PA                       | 2,45E-10 | 1,47E-11 | 2,17 |
| 8170     | unnamed protein product                                                         | 2,90E-10 | 1,74E-11 | 2,16 |
| 24640873 | CG1354-PA, isoform A                                                            | 4,01E-10 | 2,39E-11 | 2,14 |
| 21355871 | CG1309-PA                                                                       | 4,65E-10 | 2,77E-11 | 2,13 |
| 62862480 | CG40042-PA.3                                                                    | 4,77E-10 | 2,83E-11 | 2,13 |
| 24644197 | CG11999-PA                                                                      | 5,22E-10 | 3,08E-11 | 2,13 |
| 17137288 | Succinyl coenzyme A synthetase<br>flavoprotein subunit CG17246-PA, isoform<br>A | 6,44E-10 | 3,79E-11 | 2,11 |
| 5734514  | drosophila dodeca-satellite protein 1                                           | 7,53E-10 | 4,42E-11 | 2,11 |
| 19921254 | Ribosomal protein L24 CG9282-PA                                                 | 7,60E-10 | 4,44E-11 | 2,11 |
| 24640745 | Oligosaccharyltransferase 48kD subunit<br>CG9022-PA                             | 8,69E-10 | 5,06E-11 | 2,10 |
| 24667974 | Z4 CG7752-PA                                                                    | 9,90E-10 | 5,75E-11 | 2,09 |
| 17944455 | RH03140p                                                                        | 1,07E-09 | 6,20E-11 | 2,09 |
| 158767   | ubiquitin                                                                       | 1,16E-09 | 6,67E-11 | 2,08 |
| 8286     | Protein claret segregational                                                    | 1,51E-09 | 8,68E-11 | 2,07 |
| 11993642 | integral membrane pore glycoprotein<br>gp210                                    | 1,62E-09 | 9,25E-11 | 2,06 |
| 17530825 | Ribosomal protein L7A CG3314-PD, isoform<br>D                                   | 1,64E-09 | 9,36E-11 | 2,06 |
| 24582962 | CG9541-PA                                                                       | 1,89E-09 | 1,08E-10 | 2,06 |
| 17137000 | Clathrin heavy chain CG9012-PA, isoform A                                       | 2,05E-09 | 1,17E-10 | 2,05 |
| 3056723  | translation initiation factor eIF4G                                             | 2,28E-09 | 1,29E-10 | 2,05 |
| 21356113 | sec13 CG6773-PA                                                                 | 2,42E-09 | 1,36E-10 | 2,04 |
| 393376   | ETS like protein                                                                | 2,77E-09 | 1,56E-10 | 2,03 |
| 18859665 | CG11092-PA                                                                      | 3,79E-09 | 2,12E-10 | 2,02 |
| 21358129 | Spt5 CG7626-PA, isoform A                                                       | 4,54E-09 | 2,54E-10 | 2,01 |
| 7025386  | La related protein                                                              | 4,75E-09 | 2,64E-10 | 2,00 |
| 24643725 | Helicase CG1666-PA                                                              | 5,85E-09 | 3,25E-10 | 1,99 |
| 19921778 | spenito CG2910-PB, isoform B                                                    | 5,90E-09 | 3,27E-10 | 1,99 |
| 17944889 | LD29726p                                                                        | 9,83E-09 | 5,42E-10 | 1,96 |
| 17530887 | IGF-II mRNA-binding protein CG1691-PA,<br>isoform A                             | 1,25E-08 | 6,85E-10 | 1,95 |
| 18860063 | Rpt3 CG16916-PA                                                                 | 1,40E-08 | 7,66E-10 | 1,94 |
| 19921068 | CG5366-PA                                                                       | 1,59E-08 | 8,70E-10 | 1,93 |
| 28574941 | Signal recognition particle receptor beta<br>CG33162-PA                         | 1,66E-08 | 9,02E-10 | 1,93 |

|          |                                                         |          |          |      |
|----------|---------------------------------------------------------|----------|----------|------|
| 22024280 | CG3608-PA                                               | 1,89E-08 | 1,03E-09 | 1,92 |
| 21355167 | CG14648-PA, isoform A                                   | 2,24E-08 | 1,21E-09 | 1,91 |
| 18251232 | multiple ankyrin repeat single KH domain protein        | 2,42E-08 | 1,31E-09 | 1,91 |
| 24655252 | Puromycin sensitive aminopeptidase CG1009-PC, isoform C | 2,68E-08 | 1,44E-09 | 1,90 |
| 24657346 | CG1295-PA                                               | 3,10E-08 | 1,67E-09 | 1,89 |
| 17864452 | Ribosomal protein L12 CG3195-PA, isoform A              | 3,20E-08 | 1,71E-09 | 1,89 |
| 21430584 | RE12054p                                                | 4,26E-08 | 2,27E-09 | 1,88 |
| 17136866 | ADP ribosylation factor 79F CG8385-PB, isoform B        | 4,72E-08 | 2,51E-09 | 1,87 |
| 8476     | unnamed protein product                                 | 6,71E-08 | 3,56E-09 | 1,85 |
| 17737759 | Karyopherin beta 3 CG1059-PA                            | 8,46E-08 | 4,47E-09 | 1,83 |
| 17136632 | porin CG6647-PA, isoform A                              | 9,34E-08 | 4,92E-09 | 1,83 |
| 17864676 | thioredoxin peroxidase 2 CG1274-PA, isoform A           | 9,57E-08 | 5,03E-09 | 1,83 |
| 45554154 | Vap-33-1 CG5014-PA, isoform A                           | 1,07E-07 | 5,61E-09 | 1,82 |
| 17864292 | Aconitase CG9244-PB                                     | 1,16E-07 | 6,05E-09 | 1,81 |
| 24661707 | Ribosomal protein S9 CG3395-PA, isoform A               | 1,22E-07 | 6,35E-09 | 1,81 |
| 4580727  | phosphate transporter precursor                         | 1,23E-07 | 6,36E-09 | 1,81 |
| 24653595 | Heat shock protein cognate 5 CG8542-PA                  | 1,25E-07 | 6,49E-09 | 1,81 |
| 4877972  | RanGAP                                                  | 1,48E-07 | 7,61E-09 | 1,80 |
| 17136620 | microtubule star CG7109-PA                              | 1,52E-07 | 7,81E-09 | 1,80 |
| 18858175 | CG7033-PA, isoform A                                    | 1,56E-07 | 7,99E-09 | 1,80 |
| 21356771 | zetaCOP CG3948-PA, isoform A                            | 1,59E-07 | 8,12E-09 | 1,79 |
| 1632782  | Fo-ATP synthase subunit b                               | 1,62E-07 | 8,27E-09 | 1,79 |
| 2795859  | MAP kinase                                              | 1,81E-07 | 9,18E-09 | 1,79 |
| 24581914 | cyclope CG14028-PA                                      | 1,85E-07 | 9,37E-09 | 1,78 |
| 3337433  | transitional endoplasmic reticulum ATPase TER94         | 2,00E-07 | 1,01E-08 | 1,78 |
| 24585145 | lethal (2) 37Cc CG10691-PA, isoform A                   | 2,60E-07 | 1,31E-08 | 1,76 |
| 13958630 | bicoid mRNA stability factor                            | 3,46E-07 | 1,74E-08 | 1,74 |
| 24651125 | ATP synthase-gamma chain CG7610-PA, isoform A           | 3,78E-07 | 1,90E-08 | 1,74 |
| 18860011 | CG9911-PA, isoform A                                    | 4,59E-07 | 2,29E-08 | 1,73 |
| 7739653  | rasputin                                                | 5,86E-07 | 2,92E-08 | 1,71 |
| 158224   | RNA binding protein                                     | 6,37E-07 | 3,16E-08 | 1,70 |
| 6694276  | ubiquitin-like protein activating enzyme N subunit      | 1,29E-06 | 6,37E-08 | 1,66 |
| 24585152 | CG17347-PA                                              | 1,54E-06 | 7,59E-08 | 1,64 |
| 24652825 | Megator CG8274-PA                                       | 1,66E-06 | 8,17E-08 | 1,64 |
| 21356141 | CG11811-PA                                              | 1,86E-06 | 9,14E-08 | 1,63 |
| 8094     | Hrb87F                                                  | 1,98E-06 | 9,69E-08 | 1,63 |
| 18079273 | stress-sensitive B CG16944-PA, isoform A                | 2,21E-06 | 1,08E-07 | 1,62 |
| 24648946 | sar1 CG7073-PA, isoform A                               | 2,49E-06 | 1,21E-07 | 1,61 |
| 20177117 | RE37107p                                                | 2,87E-06 | 1,39E-07 | 1,60 |
| 24642361 | CG8928-PA                                               | 3,46E-06 | 1,68E-07 | 1,59 |
| 21357545 | CG8790-PA, isoform A                                    | 3,50E-06 | 1,69E-07 | 1,59 |
| 24658560 | bellwether CG3612-PA                                    | 3,64E-06 | 1,76E-07 | 1,58 |
| 11245459 | proteosome subunit RPN2                                 | 4,04E-06 | 1,94E-07 | 1,58 |
| 17864264 | Ribosomal protein L30 CG10652-PA, isoform A             | 4,32E-06 | 2,07E-07 | 1,57 |



|          |                                                                              |          |          |      |
|----------|------------------------------------------------------------------------------|----------|----------|------|
| 21358101 | CG1104-PA, isoform A                                                         | 4,45E-06 | 2,13E-07 | 1,57 |
| 157658   | heat shock protein cognate 72                                                | 4,64E-06 | 2,21E-07 | 1,57 |
| 17136706 | Roughened CG1956-PA                                                          | 5,24E-06 | 2,49E-07 | 1,56 |
| 16198344 | Mud protein                                                                  | 5,71E-06 | 2,71E-07 | 1,55 |
| 24640442 | CG1444-PA                                                                    | 5,84E-06 | 2,76E-07 | 1,55 |
| 24586067 | Eb1 CG3265-PC, isoform C                                                     | 6,92E-06 | 3,26E-07 | 1,54 |
| 17136290 | Lamin CG6944-PA                                                              | 7,26E-06 | 3,42E-07 | 1,54 |
| 45552128 | Ranbp16 CG33180-PB                                                           | 7,70E-06 | 3,61E-07 | 1,53 |
| 1699220  | D-ERp60                                                                      | 1,12E-05 | 5,25E-07 | 1,50 |
| 19921872 | Mystery 45A CG8070-PA                                                        | 1,54E-05 | 7,20E-07 | 1,48 |
| 19921016 | CG5885-PA                                                                    | 1,91E-05 | 8,88E-07 | 1,46 |
| 21064855 | SD14970p                                                                     | 1,99E-05 | 9,25E-07 | 1,46 |
| 13124189 | Probable elongation factor 1-beta (EF-1-beta)                                | 2,28E-05 | 1,06E-06 | 1,45 |
| 24647062 | Centrosomal protein 190kD CG6384-PA, isoform A                               | 2,71E-05 | 1,25E-06 | 1,44 |
| 45550174 | CG4901-PA                                                                    | 3,19E-05 | 1,47E-06 | 1,42 |
| 24652542 | CG7637-PA                                                                    | 3,58E-05 | 1,64E-06 | 1,41 |
| 24646105 | glorund CG6946-PA, isoform A                                                 | 3,67E-05 | 1,68E-06 | 1,41 |
| 1098306  | snr1 gene                                                                    | 5,08E-05 | 2,32E-06 | 1,39 |
| 24580923 | CG31938-PA                                                                   | 5,28E-05 | 2,41E-06 | 1,38 |
| 24648682 | Rab-protein 1 CG3320-PA, isoform A                                           | 5,55E-05 | 2,52E-06 | 1,38 |
| 6048198  | importin beta                                                                | 7,01E-05 | 3,18E-06 | 1,36 |
| 157012   | brahma protein                                                               | 0,00012  | 5,29E-06 | 1,32 |
| 22024201 | CG30122-PB                                                                   | 0,00013  | 5,75E-06 | 1,31 |
| 5815245  | SANT domain protein SMRTER                                                   | 0,00013  | 5,81E-06 | 1,31 |
| 28573278 | CG18584-PA                                                                   | 0,00018  | 8,24E-06 | 1,28 |
| 311997   | eukaryotic translation initiation factor 4A (eIF-4A)                         | 0,00019  | 8,59E-06 | 1,28 |
| 17137718 | A kinase anchor protein 200 CG13388-PA, isoform A                            | 0,00035  | 1,58E-05 | 1,22 |
| 13507075 | host cell factor HCF                                                         | 0,00042  | 1,88E-05 | 1,21 |
| 20129061 | CG14224-PA                                                                   | 0,00062  | 2,77E-05 | 1,17 |
| 27764453 | lingerer protein type1                                                       | 0,00066  | 2,92E-05 | 1,17 |
| 140834   | Retrovirus-related Gag polyprotein from copia-like transposable element 17.6 | 0,00084  | 3,71E-05 | 1,14 |
| 21355083 | cathD CG1548-PA                                                              | 0,00144  | 6,37E-05 | 1,09 |
| 903942   | LATS                                                                         | 0,00192  | 8,45E-05 | 1,06 |
| 158489   | alpha-spectrin                                                               | 0,00201  | 8,84E-05 | 1,06 |
| 17647799 | Protein disulfide isomerase CG6988-PA, isoform A                             | 0,00205  | 8,96E-05 | 1,06 |
| 19922662 | capping protein alpha CG10540-PA                                             | 0,00207  | 9,02E-05 | 1,05 |
| 24650584 | without children CG5965-PA                                                   | 0,00208  | 9,04E-05 | 1,05 |
| 17136538 | Topoisomerase 2 CG10223-PA                                                   | 0,00217  | 9,43E-05 | 1,05 |
| 19920620 | CG3542-PA, isoform A                                                         | 0,00244  | 0,00011  | 1,04 |
| 24641825 | CG2691-PA                                                                    | 0,00248  | 0,00011  | 1,04 |
| 24650838 | Heterogeneous nuclear ribonucleoprot at 98DE CG9983-PD                       | 0,00284  | 0,00012  | 1,02 |
| 158416   | sarco/endoplasmic reticulum-type Ca-2+-ATPase                                | 0,00468  | 0,00020  | 0,97 |
| 20151909 | SD03319p                                                                     | 0,00476  | 0,00020  | 0,97 |
| 17137220 | Rab-protein 6 CG6601-PA                                                      | 0,00654  | 0,00028  | 0,93 |
| 24651753 | fat facets CG1945-PA, isoform A                                              | 0,00962  | 0,00041  | 0,89 |
| 5420159  | FL(2)D protein                                                               | 0,01187  | 0,00050  | 0,86 |

|          |                                  |         |         |      |
|----------|----------------------------------|---------|---------|------|
| 22024213 | CG16716-PB, isoform B            | 0,01514 | 0,00064 | 0,83 |
| 28557557 | SD25413p                         | 0,01797 | 0,00076 | 0,81 |
| 20129377 | CG13393-PA                       | 0,01823 | 0,00077 | 0,81 |
| 28572980 | CG17802-PA                       | 0,02183 | 0,00091 | 0,78 |
| 21358227 | CG1458-PA                        | 0,02416 | 0,00101 | 0,77 |
| 24652322 | 14-3-3zeta CG17870-PD, isoform D | 0,02662 | 0,00111 | 0,76 |
| 6006748  | hnRNP K protein homolog          | 0,03348 | 0,00139 | 0,73 |
| 17738151 | Tat-binding protein-1 CG10370-PA | 0,03553 | 0,00147 | 0,72 |
| 24649731 | CG5794-PD, isoform D             | 0,04598 | 0,00190 | 0,68 |

\* The table includes interactors that were detected in three independent LC-MS/MS experiments.
