# Supplementary material for: An Interaction between RRP6 and SU(VAR)3-9 Targets RRP6 to Heterochromatin and Contributes to Heterochromatin Maintenance in Drosophila melanogaster
Source: PubMed Central journal article supplement (PMC4577213; doi:10.1371/journal.pgen.1005523), 2015-09-21
Supplement: pgen.1005523.s017.pdf [file pgen.1005523.s017.pdf]

**Table S2. List of the most increased and most decreased transposon insertion sites****INCREASED**

| <b>Transposon insertion site</b> | <b>Transposon type</b>                           |
|----------------------------------|--------------------------------------------------|
| Doc3{}571                        | non_LTR_retrotransposon                          |
| Stalker2{}736                    | LTR_retrotransposon                              |
| NOF{}735                         | DNA transposon/ terminal_inverted_repeat_element |
| diver{}873                       | LTR_retrotransposon                              |
| blood{}1462                      | LTR_retrotransposon                              |
| G4{}570                          | non_LTR_retrotransposon                          |
| 1360{}1481                       | DNA transposon/ terminal_inverted_repeat_element |
| 1360{}517                        | DNA transposon/ terminal_inverted_repeat_element |
| transib3{}567                    | DNA transposon/ terminal_inverted_repeat_element |
| diver2{}1137                     | LTR_retrotransposon                              |
| invader5{}566                    | LTR_retrotransposon                              |
| Cr1a{}575                        | non_LTR_retrotransposon                          |
| blood{}356                       | LTR_retrotransposon                              |
| 412{}882                         | LTR_retrotransposon                              |
| copia{}1466                      | LTR_retrotransposon                              |
| 1360{}569                        | DNA transposon/ terminal_inverted_repeat_element |
| Tirant{}1399                     | LTR_retrotransposon                              |
| jockey{}288                      | non_LTR_retrotransposon                          |
| 1360{}1138                       | DNA transposon/ terminal_inverted_repeat_element |
| aurora-element{}589              | LTR_retrotransposon                              |

**DECREASED**

| <b>Transposon insertion site</b> | <b>Transposon type</b>                           |
|----------------------------------|--------------------------------------------------|
| 3S18{}1090                       | LTR_retrotransposon                              |
| 412{}904                         | LTR_retrotransposon                              |
| S-element{}1357                  | DNA transposon/ terminal_inverted_repeat_element |
| jockey{}307                      | non_LTR_retrotransposon                          |
| pogo{}921                        | DNA transposon/ terminal_inverted_repeat_element |
| roo{}952                         | LTR_retrotransposon                              |
| roo{}366                         | LTR_retrotransposon                              |
| roo{}314                         | LTR_retrotransposon                              |
| roo{}1429                        | LTR_retrotransposon                              |
