# Supplementary material for: An Interaction between RRP6 and SU(VAR)3-9 Targets RRP6 to Heterochromatin and Contributes to Heterochromatin Maintenance in Drosophila melanogaster
Source: PubMed Central journal article supplement (PMC4577213; doi:10.1371/journal.pgen.1005523), 2015-09-21
Supplement: pgen.1005523.s018.pdf [file pgen.1005523.s018.pdf]

**Table S3. RRP6-bound genes showing differential transcript levels ( $\log_2 >1$ ) in RRP6-depleted cells**

| INCREASED |         |          |         |         |         |
|-----------|---------|----------|---------|---------|---------|
| CG31279   | CG32111 | CG34155  | CG4467  | Scp2    | fz2     |
| CR43857   | CG34172 | CG34114  | acj6    | CG2254  | peb     |
| CG14692   | CR43610 | E23      | CG31004 | CG43902 | pog     |
| os        | side    | verm     | CG32698 | AlstR   | CG11966 |
| salr      | CG12541 | CG17764  | CG3921  | CG2901  | m       |
| CG10625   | CG14326 | lr40a    | cas     | CG42749 | CG15753 |
| CG13506   | CG42329 | W        | Lkr     | CG14837 | ckd     |
| Nep3      | CG9400  | ham      | CG42708 | CG4168  | w       |
| Dscam2    | dpr8    | dan      | CG41520 | CG42594 | DAT     |
| abba      | CG17684 | gk       | nop5    | elk     | para    |
| CG11693   | Rim     | sdt      | CR43801 | CG9782  | Side    |
| CG43265   | kirre   | Gk       | CG30110 | dally   | CG6928  |
| CG8065    | cato    | CG4404   | Nckx30C | TrxT    | CG17839 |
| CG9095    | CG14010 | phm      | CG43347 | tutl    | Pop2    |
| Snap25    | lobo    | Cht7     | CG43796 | Cpr76Bd | Socs36E |
| upd3      | pdm2    | Hdc      | D       | dnr1    | CG42342 |
| CG7884    | CG32720 | D2R      | dpr     | CG34380 | GC      |
| qvr       | CG31475 | CG31191  | Rdl     | sano    | mmd     |
| CR43461   | CR43334 | Fas3     | Sulf1   | CG11317 | gl      |
| CG34347   | CG2256  | mun      | CG6520  | CG34354 | CG1443  |
| bi        | Sox100B | Fas2     | otp     | CG34391 | CG33988 |
| CG14521   | nkd     | CG7691   | Cng     | CG7330  | CG12531 |
| SIP2      | CG13743 | CG13838  | CG43462 | CR43960 | CG3168  |
| CG2022    | CG43109 | CG43290  | CG30419 | nvd     | ASPP    |
| CG14661   | Gef64C  | bab2     | stan    | CG3198  | CG34353 |
| CR43283   | Mocs1   | gprs     | Fhos    | CG33143 | mfr     |
| dys       | CG31808 | CG18675  | Clk     | TyrRll  | sn      |
| CG42683   | CR34052 | hbs      | Eip93F  | CG13954 | Btd     |
| CR43650   | vn      | Sur      | MRP     | Spargel | futsch  |
| eya       | Nos     | Pkcdelta | CG14324 | CG42524 | sca     |
| CG15572   | sr      | CG31626  | CG18302 | Lasp    | d       |
| Dr        | CG34386 | fas      | CG42534 | Rgk1    | Ast     |
| CG42673   | CG34286 | Teh2     | CG8861  | CG4374  | CG42613 |
| CR43951   | CG9650  | Sobp     | CR41621 | CG33158 | trx     |
| Syt12     | Pdfr    | Glut1    | Frq2    | ogre    | CG9287  |
| CG42732   | Fili    | sns      | Mip     | Dip2    |         |
| CG15765   | CG34113 | CG13837  | RpS28a  | ptr     |         |
| DECREASED |         |          |         |         |         |
| Pkc53E    | CG14185 | LRP1     | CG43797 | Cyp4g15 | Cpr65Eb |
| CG14180   | CG12061 | CG17341  | CG31663 | pcl     | Vsx2    |
| CR40546   | CG42343 | CG7224   | CG10361 | CG2111  |         |
| vkg       | CG40467 | retn     | klg     | btd     |         |
| CG1092    | Ubx     | DI       | CG14292 | CG32105 |         |
| Trh       | CG10249 | SK       | CG43676 | Trim9   |         |
