# Supplementary material for: An Interaction between RRP6 and SU(VAR)3-9 Targets RRP6 to Heterochromatin and Contributes to Heterochromatin Maintenance in Drosophila melanogaster
Source: PubMed Central journal article supplement (PMC4577213; doi:10.1371/journal.pgen.1005523), 2015-09-21
Supplement: pgen.1005523.s019.pdf [file pgen.1005523.s019.pdf]

Eberle et al.

**Table S4. Effect of RRP6 depletion on the expression of RRP6-bound genes**

|                 | Number of genes in each class | Average expression (RNA-seq signal in GFP_control) | Nr. genes with increased expression in RRP6_kd (log2 ratio > 1) | Average fold change RRP6_kd vs GFP_control (log2 ratio > 1) |
|-----------------|-------------------------------|----------------------------------------------------|-----------------------------------------------------------------|-------------------------------------------------------------|
| All genes       | 13272                         | 1,699                                              | 1534                                                            | 0,409                                                       |
| RRP6-bound      | 967                           | 2,666                                              | 220                                                             | 0,421                                                       |
| SUV-dependent   | 321                           | 3,169                                              | 63                                                              | 0,437                                                       |
| SUV-independent | 646                           | 2,416                                              | 142                                                             | 0,412                                                       |
